# Supplementary material for: Design of novel hierarchical cage active particles and zeolite for the direct conversion of syngas to gasoline fuel
Source: Royal Society of Chemistry journal article supplement (doi:10.1039/d4nj00900b), 2024-01-01
Supplement: d4nj00900b1.pdf [file d4nj00900b1.pdf]

## Design of novel hierarchical cage active particles and zeolite for direct conversion of syngas to gasoline fuel

Yulan Zhang\* and Xizhu Lin

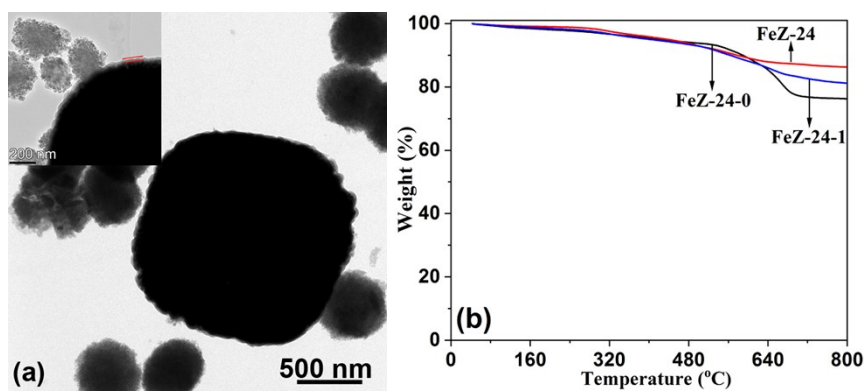

**Fig.S1** (a) TEM image of FeZ-24-1, (b) TG of the used catalysts after FTS reaction.

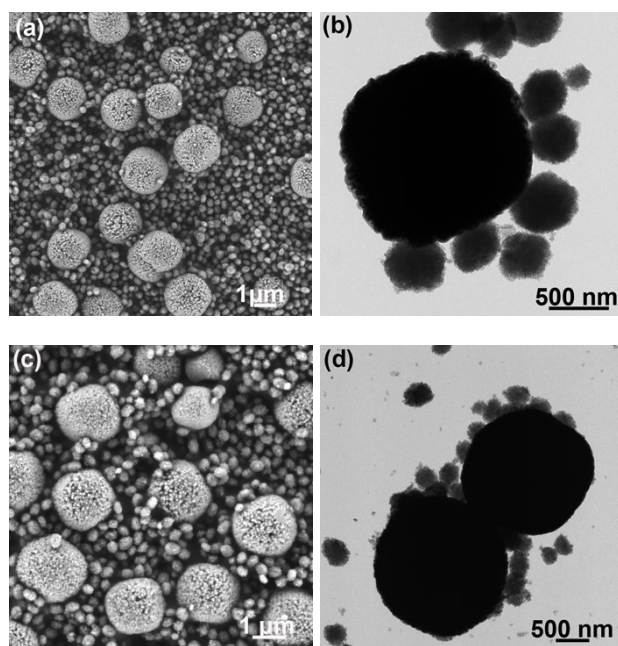

**Fig.S2** Morphology of the prepared catalysts: (a) SEM image of FeZ-16, (b) TEM image of FeZ-16, (c) SEM image of FeZ-27, (d) TEM image of FeZ-27.

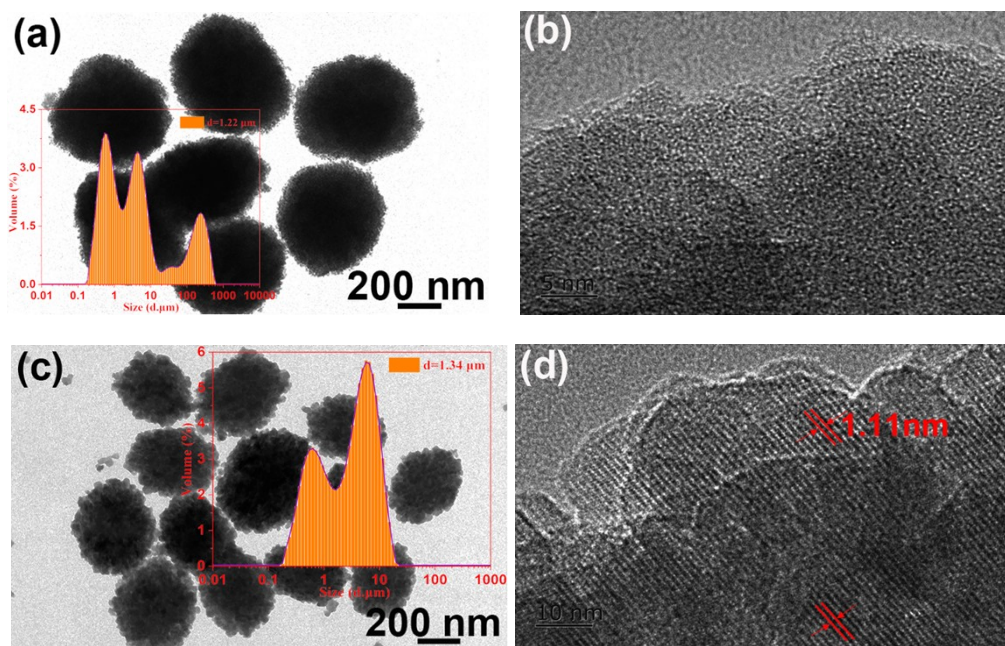

**Fig.S3** TEM images and particle size distribution of the prepared zeolites: (a) zeolite-16, (b) HRTEM image of zeolite-16, (c) zeolite-27, (d) HRTEM image of zeolite-27.

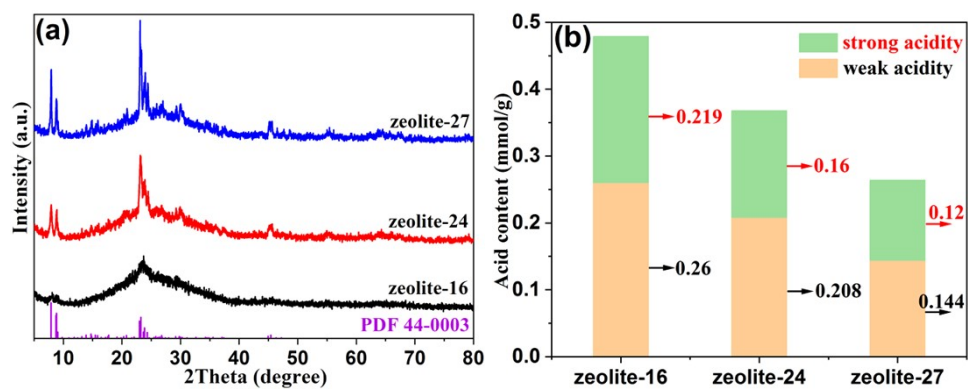

Fig.S4 XRD patterns (a) and acid content (b) of the zeolites.

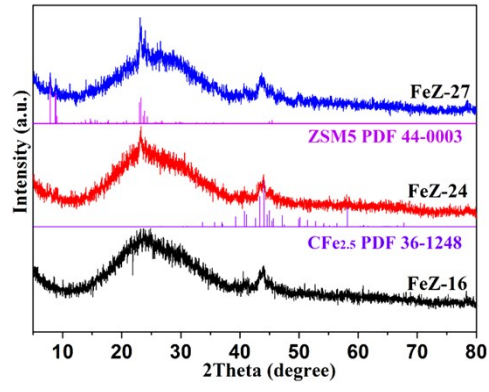

**Fig.S5** XRD patterns of the zeolite-introduced catalysts.

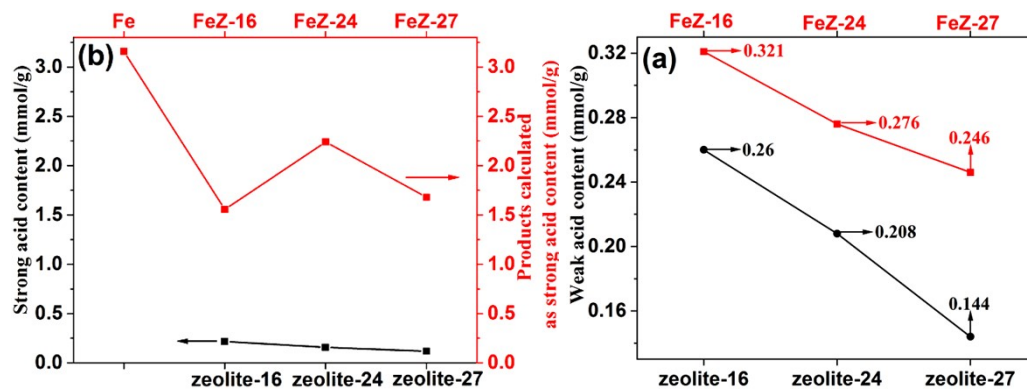

**Fig.S6** NH<sub>3</sub>-TPD results of the reduced catalysts: (a) a lower temperature, (b) a higher temperature.

**Table S1** Performances of the reduced catalysts

| Performance | Surface area (m <sup>2</sup> /g) | Pore size (nm) |
|-------------|----------------------------------|----------------|
| Fe          | 27.5                             | 3.10           |
| FeZ-16      | 116.7                            | 7.08           |
| FeZ-24      | 193.0                            | 6.04           |
| FeZ-27      | 212.5                            | 9.96           |

**Table S2** Catalytic performance of the hybrid catalysts at the given reaction condition

| Reaction conditions |        | CO<br>conv. (%) | Hydrocarbons selectivity (wt%) |                                             |                       |                                 |                  | Products in C <sub>5+</sub><br>(%) |                   |
|---------------------|--------|-----------------|--------------------------------|---------------------------------------------|-----------------------|---------------------------------|------------------|------------------------------------|-------------------|
|                     |        |                 | CH <sub>4</sub>                | C <sub>2</sub> -C <sub>4</sub> <sup>0</sup> | $\frac{C_2^-}{C_4^-}$ | C <sub>5</sub> -C <sub>11</sub> | C <sub>12+</sub> | aromatic                           | i-C <sub>5+</sub> |
| Fe                  | 280 °C | 74.9            | 15.3                           | 10.8                                        | 26.7                  | 35.6                            | 11.6             | 6.38                               | 24.9              |
| FeZ-16              | 280 °C | 75.2            | 16.4                           | 11.1                                        | 16.0                  | 53.8                            | 2.70             | 9.19                               | 77.4              |
|                     | 260 °C | 58.3            | 18.5                           | 13.2                                        | 5.84                  | 59.9                            | 2.56             | 28.1                               | 41.2              |
|                     | 270 °C | 71.2            | 17.7                           | 13.3                                        | 2.88                  | 63.8                            | 2.32             | 36.3                               | 60.1              |
| FeZ-24              | 280 °C | 78.1            | 19.1                           | 14.6                                        | 2.34                  | 63.5                            | 0.46             | 25.7                               | 60.5              |
|                     | 290 °C | 82.0            | 23.3                           | 16.5                                        | 1.48                  | 56.5                            | 2.22             | 50.8                               | 41.8              |
|                     | 300 °C | 90.4            | 26.5                           | 18.7                                        | 0.99                  | 49.3                            | 4.51             | 51.2                               | 45.8              |
|                     | 310 °C | 94.5            | 32.5                           | 21.2                                        | 0.77                  | 42.6                            | 2.93             | 64.4                               | 27.8              |
| FeZ-24-0            | 280 °C | 75.3            | 16.4                           | 12.3                                        | 4.41                  | 64.8                            | 2.09             | 24.6                               | 42.8              |
| FeZ-24-1            | 280 °C | 80.5            | 18.8                           | 15.7                                        | 1.85                  | 60.5                            | 3.15             | 42.3                               | 30.7              |
| FeZ-27              | 280 °C | 83.7            | 17.1                           | 12.9                                        | 3.83                  | 63.9                            | 2.27             | 25.2                               | 64.5              |
